# Supplementary material for: Soluble Non-Starch Polysaccharides From Plantain (Musa x paradisiaca L.) Diminish Epithelial Impact of Clostridioides difficile
Source: PubMed Central journal article supplement (PMC8707065; doi:10.3389/fphar.2021.766293), 2021-12-10

## Supplementary materials:

**Figure S1. Visualisation of purified *Clostridioides difficile* spores.** Purification methods involving vegetative cell lysis (2 h), serial washing with cold sterile water and a heat treatment (60°C, for 20 min) were used to generate a pure *C. difficile* spore preparation. Schaeffer and Fulton endospore stain showing spores isolated from *C. difficile* strain 98011, **A)** before and **B)** after purification. Vegetative cells are stained pink and spores are stained green. Spores are indicated by arrows.

**A**

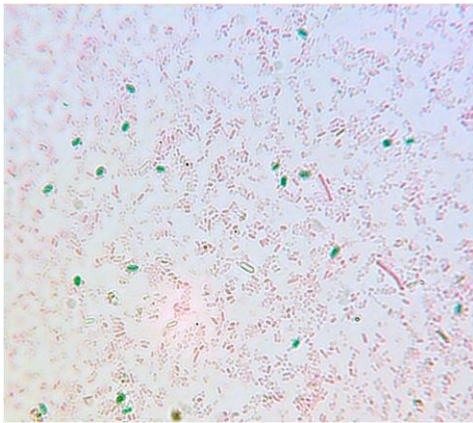

**B**

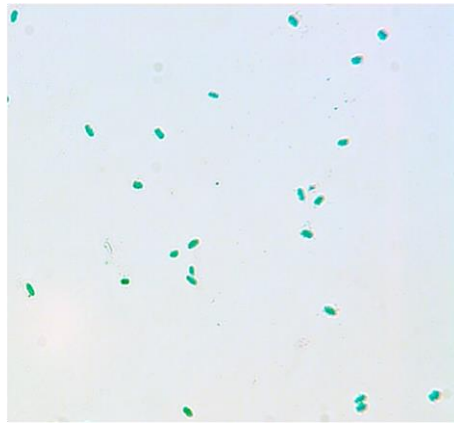

Supplement: Image1.pdf [file Image1.pdf]
