# Supplementary material for: Soluble Non-Starch Polysaccharides From Plantain (Musa x paradisiaca L.) Diminish Epithelial Impact of Clostridioides difficile
Source: PubMed Central journal article supplement (PMC8707065; doi:10.3389/fphar.2021.766293), 2021-12-10

## Supplementary materials:

**Figure S3. Plantain NSP induces cellular chloride ion channel activity in intestinal cells in a dose-dependent manner, but inhibition of chloride efflux does not inhibit plantain NSP-induced blockade of *Clostridioides difficile*-epithelial cell adhesion. (A)** Pre-treatment for 30 min with soluble plantain NSP (2.5-20 mg/mL) induced chloride channel activity in Caco2 cells. Oat and bean NSP, at 5 mg/mL, also significantly increased chloride channel activity, whilst pear, pepper and apple NSP exhibited no significant effect. Chloride channel activity in was measured by monitoring cellular iodide efflux measured using the Modified Sandell-Kolthoff reaction. Chloride channel activity was expressed as fold change in comparison to the vehicle treated control. **(B)** Soluble plantain fibre (10 mg/mL) mediated cellular chloride channel activity was dose-dependently reduced in the presence of chloride channel antagonists, NPPB (0 – 800  $\mu$ M) and CFTR Inh172 (0 – 200  $\mu$ M) compared to vehicle-treated controls. **(C)** The action of plantain NSP on *C. difficile* epithelial cell adhesion was not seen to be blocked with 800  $\mu$ M NPPB or 200  $\mu$ M Inh172 (1 h pre-treatment, prior to treatment with or without plantain NSP (30 min)). **(D)** *C. difficile* adhesion assessed following pre-treatment of Caco2 cells with or without 800  $\mu$ M NPPB or 200  $\mu$ M Inh172 (1 h), followed by treatment with or without 100  $\mu$ M RP107 (30 min). For all, bacterial adhesion is expressed relative to the CFU/mL found in the untreated control (set as 100%), with N=3 experiments, n  $\geq$  3 replicates; \*\*  $P < 0.01$ , \*\*\*  $P < 0.001$ ; Kruskal-Wallis test.

### A

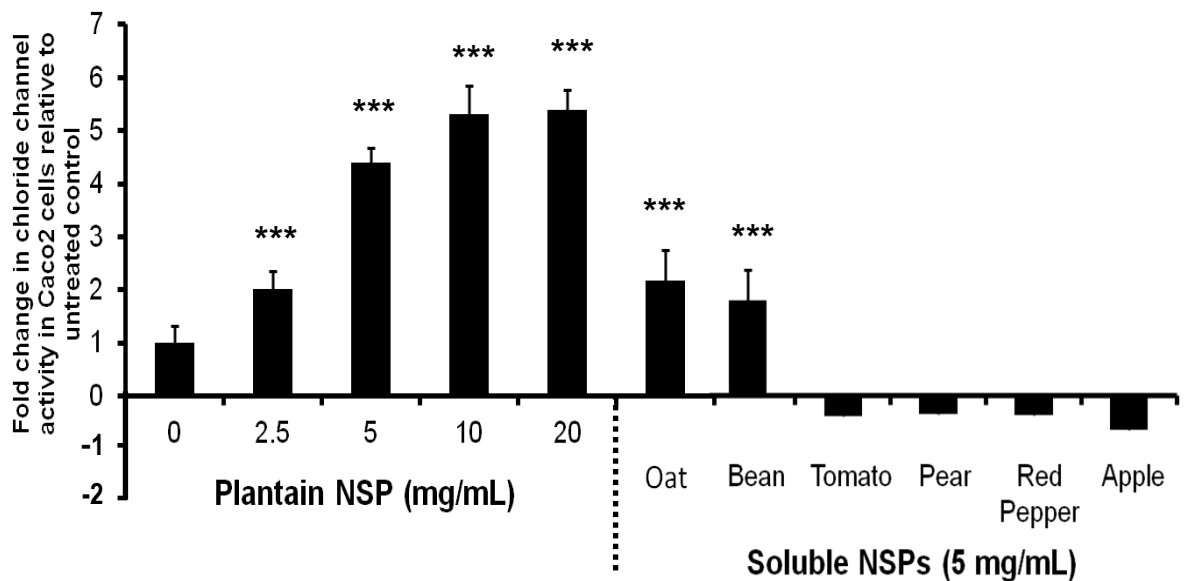

### B

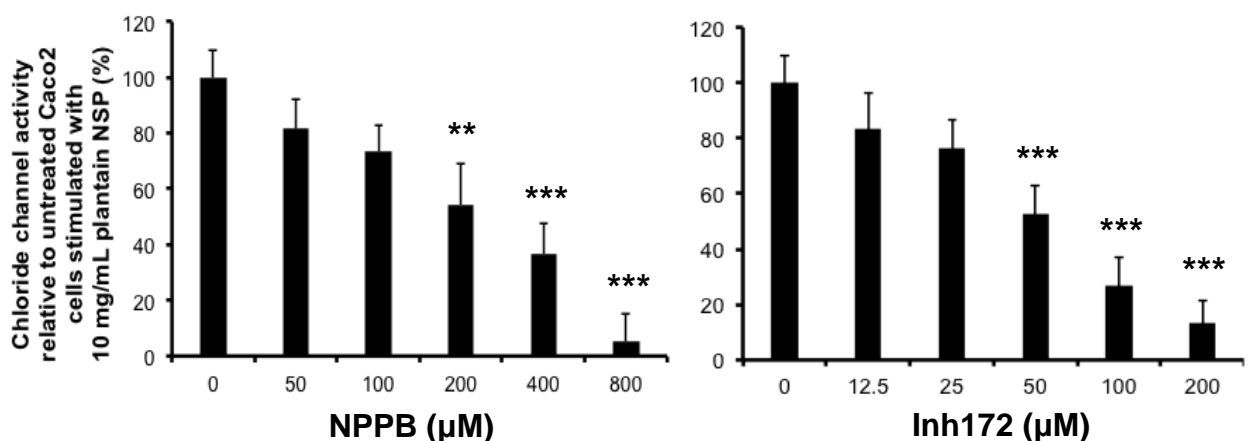

**C**

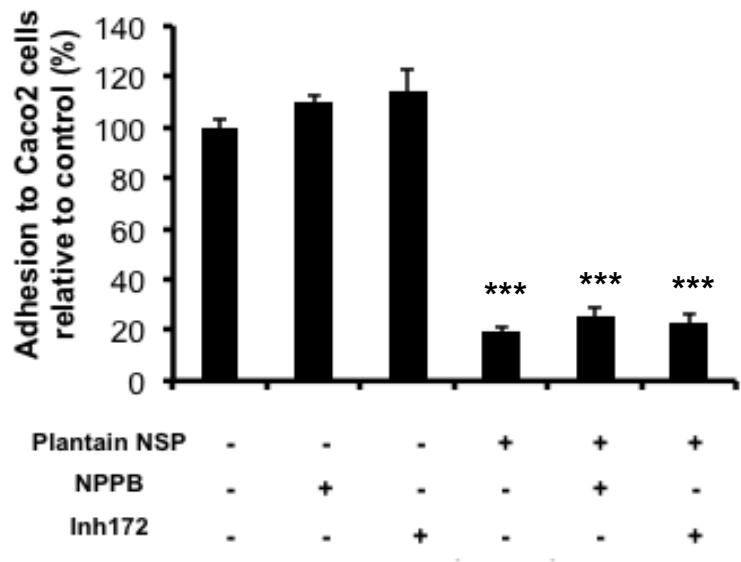

**D**

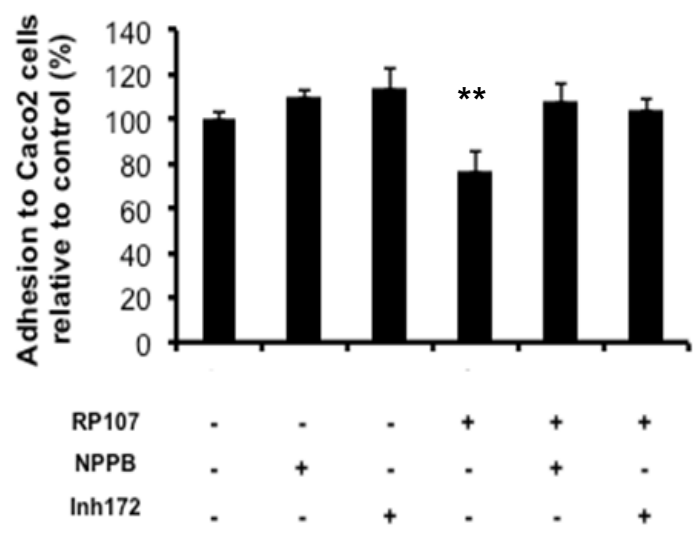

Supplement: Image3.pdf [file Image3.pdf]
